# Supplementary material for: Cost-effectiveness of bringing a nurse into an Italian genetic day clinic: a before and after study
Source: BMC Health Serv Res. 2023 Nov 20;23:1278. doi: 10.1186/s12913-023-10238-8 (PMC10662525; doi:10.1186/s12913-023-10238-8)
Supplement: Supplementary file 1 — Additional file 1. Supplementary Material 1. Italian Survey for patient's perception of service quality. [file 12913_2023_10238_MOESM1_ESM.pdf]

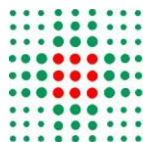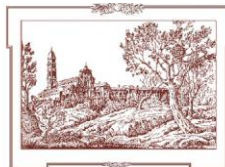

## INTERVISTA SEMI STRUTTURATA

1. Riportandola indietro negli anni, in particolare a quando ha iniziato il percorso clinico presso il nostro ambulatorio ha notato dei cambiamenti nella organizzazione rispetto alla situazione odierna?

➤ SI ☐

➤ NO ☐

➤ Se ha risposto SI, quali:

Elementi positivi

.....

.....

.....

.....

Elementi negativi

.....

.....

.....

.....

2. In particolare, pensando alle visite fatte prima del 2018 e dal 2019, ha notato cambiamenti:

➤ Nell'accoglienza in ambulatorio SI ☐ NO ☐

i. se sì quali.....  
.....

➤ Nelle informazioni ricevute SI ☐ NO ☐

i. se sì quali.....  
.....

➤ Nella possibilità di contattare il servizio SI ☐ NO ☐

i. se sì quali.....  
.....

➤ Attesa nella sala d'aspetto SI ☐ NO ☐

i. se sì quali.....  
.....

Se vuole aggiungere altri commenti.....

.....  
.....  
.....  
.....

Grazie per la collaborazione  
Ambulatorio di Genetica Medica
